# Supplementary material for: Effect of different thresholds for CT perfusion volumetric analysis on estimated ischemic core and penumbral volumes
Source: PubMed Central journal article supplement (PMC8059822; doi:10.1371/journal.pone.0249772), 2021-04-21
Supplement: pone.0249772.s003.pdf [file pone.0249772.s003.pdf]

**S1 Table.** Excluded patients

|                                                                                            |                                                         |     |
|--------------------------------------------------------------------------------------------|---------------------------------------------------------|-----|
| All consecutive EVT patients with anterior circulation LAO (age $\geq$ 18 years)           |                                                         | 125 |
| Exclusion due to deviant image data                                                        |                                                         | 32  |
|                                                                                            | Imaging performed elsewhere                             | 23  |
|                                                                                            | CTP not performed                                       | 5   |
|                                                                                            | CTP failure                                             | 2   |
|                                                                                            | Control imaging with MRI                                | 2   |
| Exclusion due to good angiographic response to coincident intravenous thrombolytic therapy |                                                         | 14  |
| Other reason for exclusion                                                                 |                                                         | 27  |
|                                                                                            | Fluctuating symptoms                                    | 2   |
|                                                                                            | Chronic Intracranial stenosis in angiography            | 5   |
|                                                                                            | Proximal ICA stenosis requiring carotid artery stenting | 20  |
| Total excluded patients                                                                    |                                                         | 73  |
| Total included patients                                                                    |                                                         | 52  |

Abbreviations: EVT=Endovascular treatment LAO=Large artery occlusion, CTP=Computed tomography perfusion, MRI=Magnetic resonance imaging, ICA=Internal carotid artery
