# Supplementary material for: Effect of different thresholds for CT perfusion volumetric analysis on estimated ischemic core and penumbral volumes
Source: PubMed Central journal article supplement (PMC8059822; doi:10.1371/journal.pone.0249772), 2021-04-21
Supplement: pone.0249772.s004.pdf [file pone.0249772.s004.pdf]

**S2 Table.** Patient baseline and admission imaging characteristics

|                                   |                   |                |
|-----------------------------------|-------------------|----------------|
| All patients, n                   |                   | 52             |
| Age, years, mean $\pm$ SD         |                   | 68.3 $\pm$ 9.3 |
| Female, n (%)                     |                   | 22 (42.3)      |
| Atrial fibrillation, n (%)        |                   | 25 (48.1)      |
| Hypertension, n (%)               |                   | 34 (65.4)      |
| Coronary artery disease, n (%)    |                   | 11 (21.2)      |
| Hyperlipidemia, n (%)             |                   | 19 (36.5)      |
| Diabetes, n (%)                   |                   | 12 (23.1)      |
| Heart failure, n (%)              |                   | 13 (25.0)      |
| Age over 80 years, n (%)          |                   | 6 (11.5)       |
| Location of Clot/occlusion, n (%) | proximal ICA      | 13 (25)        |
|                                   | M1 segment, MCA   | 26 (50)        |
|                                   | M2 segment, MCA   | 13 (25)        |
| Left hemisphere n (%)             |                   | 28 (54)        |
| Safe onset n (%)                  |                   | 35 (67.3)      |
| Unknown onset n (%)               | Total             | 17 (32.7)      |
|                                   | Last symptom free | 4 (7.7)        |
|                                   | Wake-up stroke    | 7 (13.5)       |
|                                   | Found/unknown     | 6 (11.5)       |

Abbreviations: IQR=Interquartile range, SD=Standard Deviation, ICA=Internal Carotid Artery, MCA=Middle Cerebral Artery,
