# Supplementary material for: Effect of different thresholds for CT perfusion volumetric analysis on estimated ischemic core and penumbral volumes
Source: PubMed Central journal article supplement (PMC8059822; doi:10.1371/journal.pone.0249772), 2021-04-21
Supplement: pone.0249772.s005.pdf [file pone.0249772.s005.pdf]

**S3 Table.** Procedural and outcome characteristics

|                                                         |                                                |                 |
|---------------------------------------------------------|------------------------------------------------|-----------------|
| Preoperative Iv Thrombolysis n (%)                      |                                                | 31 (59.6)       |
| Form of sedation/anesthesia n (%)                       | Conscious sedation                             | 39 (75.0)       |
|                                                         | General anesthesia                             | 5 (9.6)         |
|                                                         | Topical anesthesia                             | 8 (15.4)        |
| Safe onset to reperfusion (min), median (IQR), (n=28)   |                                                | 290 (206-354)   |
| Safe onset to imaging (min), median (IQR), (n=35)       |                                                | 159(91-242)     |
| Imaging to reperfusion time (min) median (IQR) (n=80) * |                                                | 113 (90-155)    |
|                                                         | Under median time n (%)                        | 21 (40.4)       |
|                                                         | In median time or over or no reperfusion n (%) | 31 (59.6)       |
| TICI Score                                              | TICI 2b/3 n (%)                                | 34 (65.4)       |
|                                                         | TICI 0-2a, n (%)                               | 18 (34.6)       |
| Intra-arterial procedure                                | Retriever n (%)                                | 35 (67.3)       |
|                                                         | Aspiration only n (%)                          | 11 (21.2)       |
|                                                         | Clot not reached n (%)                         | 6 (11.5)        |
| Follow-up CT delay (days), mean $\pm$ SD                |                                                | 1 $\pm$ 0.75    |
| FIV seen on Follow-up CT (mL) median (IQR)              |                                                | 26.1 (6.4-82.2) |
| Infarct Size over 70 mL n (%)                           |                                                | 14 (26.9)       |

\*11 Patients with TICI 0 excluded. Abbreviations: IQR=Interquartile Range, CTP=Computed Tomography Perfusion, TICI=Thrombolysis in Cerebral Infarction Scale, SD=Standard deviation, CT=Computed Tomography. IC=Ischemic Core, FIV=Final Infarct Volume
